# Supplementary material for: A Low-Cost, Integrated Immunization, Health, and Nutrition Intervention in Conflict Settings in Pakistan—The Impact on Zero-Dose Children and Polio Coverage
Source: MDPI journal article supplement (doi:10.3390/pathogens13030185), 2024-02-20
Supplement: s1 [file s1]

# Supplementary Material

**Table S1: Peshawar - UC-Level Immunization Coverage at Baseline and Endline for Children Under-Three in Intervention and Control Areas**

|                                                | Baseline   |              | Endline    |              | Control-% diff<br>(95% CI) | Intervention-%<br>diff (95% CI) | DID estimate-%<br>diff (95% CI) | DID<br>estimate-<br>P value |
|------------------------------------------------|------------|--------------|------------|--------------|----------------------------|---------------------------------|---------------------------------|-----------------------------|
|                                                | Control    | Intervention | Control    | Intervention |                            |                                 |                                 |                             |
| <b>Immunization Status</b>                     |            |              |            |              |                            |                                 |                                 |                             |
|                                                | N=333      | N=350        | N=364      | N=300        |                            |                                 |                                 |                             |
| Fully Immunized                                | 136 (39.8) | 161 (42.6)   | 222 (61.3) | 208 (69.1)   | 21.5 (11.3, 31.7)          | 26.5 (15.4, 37.6)               | 5.0 (-9.7, 19.8)                | 0.4998                      |
| Partially Immunized                            | 188 (57.2) | 180 (54.9)   | 136 (36.9) | 89 (29.3)    | -20.3 (-30.1, -10.4)       | -25.7 (-35.9, -15.4)            | -5.4 (-19.3, 8.6)               | 0.4451                      |
| Non-recipients of Routine Immunization (NR-RI) | 9 (3.0)    | 9 (2.5)      | 6 (1.7)    | 3 (1.6)      | -1.2 (-4.3, 1.9)           | -0.9 (-3.9, 2.2)                | 0.4 (-3.9, 4.6)                 | 0.8701                      |
| Zero Dose                                      | 9 (3.0)    | 6 (1.5)      | 5 (1.5)    | 1 (0.5)      | -1.5 (-4.4, 1.4)           | -1.0 (-2.9, 0.8)                | 0.5 (-2.9, 3.8)                 | 0.7865                      |
| Ever had Vaccination Card                      | 279 (78.0) | 305 (88.8)   | 351 (96.0) | 280 (93.1)   | 18.0 (4.6, 31.4)           | 4.3 (-2.5, 11.1)                | -13.7 (-28.4, 1.0)              | 0.0668                      |
| <b>At Birth</b>                                |            |              |            |              |                            |                                 |                                 |                             |
|                                                | N=333      | N=350        | N=364      | N=300        |                            |                                 |                                 |                             |
| BCG                                            | 323 (96.4) | 332 (94.6)   | 355 (97.4) | 297 (98.4)   | 1.1 (-3.4, 5.5)            | 3.8 (-2.0, 9.7)                 | 2.8 (-4.4, 9.9)                 | 0.4466                      |
| OPV0                                           | 319 (95.7) | 339 (97.0)   | 345 (94.9) | 283 (93.4)   | -0.7 (-5.3, 3.8)           | -3.5 (-8.3, 1.2)                | -2.8 (-9.2, 3.6)                | 0.3878                      |
| <b>At 6 Weeks</b>                              |            |              |            |              |                            |                                 |                                 |                             |
|                                                | N=327      | N=348        | N=353      | N=297        |                            |                                 |                                 |                             |
| OPV1                                           | 183 (57.8) | 203 (56.1)   | 318 (89.9) | 271 (89.9)   | 32.1 (18.2, 46.0)          | 33.7 (20.0, 47.4)               | 1.6 (-17.5, 20.7)               | 0.8679                      |
| Penta 1                                        | 301 (91.3) | 269 (75.6)   | 319 (90.1) | 270 (89.4)   | -1.3 (-7.3, 4.8)           | 13.8 (1.4, 26.3)                | 15.1 (1.6, 28.7)                | 0.0292                      |
| PCV 1                                          | 296 (90.4) | 264 (73.8)   | 320 (90.4) | 267 (88.7)   | 0.0 (-6.0, 6.1)            | 14.9 (1.7, 28.1)                | 14.9 (0.7, 29.1)                | 0.0404                      |
| Rota Virus 1                                   | 303 (91.6) | 289 (81.8)   | 315 (89.1) | 262 (87.3)   | -2.5 (-8.7, 3.7)           | 5.5 (-5.0, 15.9)                | 7.9 (-3.9, 19.8)                | 0.1864                      |
| <b>At 10 Weeks</b>                             |            |              |            |              |                            |                                 |                                 |                             |
|                                                | N=312      | N=343        | N=337      | N=293        |                            |                                 |                                 |                             |
| OPV 2                                          | 159 (51.6) | 185 (51.9)   | 272 (81.0) | 249 (85.2)   | 29.4 (14.7, 44.1)          | 33.4 (20.6, 46.1)               | 4.0 (-15.1, 23.0)               | 0.6796                      |
| Penta 2                                        | 166 (54.5) | 197 (55.0)   | 281 (83.0) | 254 (86.5)   | 28.5 (15.6, 41.4)          | 31.5 (17.4, 45.6)               | 3.0 (-15.8, 21.7)               | 0.7526                      |
| PCV 2                                          | 166 (54.5) | 196 (54.7)   | 280 (82.9) | 250 (85.2)   | 28.3 (15.5, 41.1)          | 30.5 (16.1, 44.9)               | 2.2 (-16.7, 21.0)               | 0.8201                      |
| Rota Virus 2                                   | 163 (53.4) | 187 (52.2)   | 274 (80.7) | 251 (85.6)   | 27.3 (14.1, 40.5)          | 33.4 (20.3, 46.6)               | 6.1 (-12.1, 24.3)               | 0.5050                      |
| <b>At 14 Weeks</b>                             |            |              |            |              |                            |                                 |                                 |                             |
|                                                | N=301      | N=337        | N=323      | N=284        |                            |                                 |                                 |                             |
| OPV 3                                          | 145 (49.0) | 169 (47.8)   | 235 (73.0) | 235 (83.4)   | 24.1 (10.5, 37.7)          | 35.6 (24.8, 46.5)               | 11.6 (-5.5, 28.6)               | 0.1801                      |
| Penta 3                                        | 126 (41.5) | 164 (45.9)   | 244 (75.7) | 232 (81.2)   | 34.2 (23.8, 44.7)          | 35.3 (23.3, 47.3)               | 1.1 (-14.5, 16.7)               | 0.8891                      |
| PCV 3                                          | 126 (41.5) | 164 (45.9)   | 233 (72.5) | 231 (80.8)   | 31.0 (20.2, 41.8)          | 34.9 (23.1, 46.6)               | 3.9 (-11.8, 19.5)               | 0.6243                      |
| IPV 1                                          | 265 (88.9) | 237 (67.7)   | 240 (74.3) | 214 (74.8)   | -14.6 (-22.0, -7.2)        | 7.0 (-7.4, 21.5)                | 21.7 (5.8, 37.5)                | 0.0081                      |
| <b>At 9 Months</b>                             |            |              |            |              |                            |                                 |                                 |                             |
|                                                | N=248      | N=256        | N=259      | N=233        |                            |                                 |                                 |                             |
| Measles 1                                      | 199 (79.1) | 191 (71.0)   | 205 (79.1) | 183 (78.4)   | 0.0 (-7.7, 7.6)            | 7.4 (-5.5, 20.2)                | 7.4 (-7.2, 22.1)                | 0.3150                      |
| <b>At 15 months</b>                            |            |              |            |              |                            |                                 |                                 |                             |
|                                                | N=202      | N=204        | N=195      | N=177        |                            |                                 |                                 |                             |
| Measles 2                                      | 113 (51.1) | 125 (55.5)   | 139 (71.2) | 123 (69.8)   | 20.1 (9.0, 31.2)           | 14.2 (-0.7, 29.2)               | -5.9 (-24.1, 12.4)              | 0.5231                      |

**Table S2: Lakki Marwat - UC-Level Immunization Coverage at Baseline and Endline for Children Under-Three in Intervention and Control Areas**

|                                                | Baseline     |              | Endline      |              | Control-% diff<br>(95% CI) | Intervention-%<br>diff (95% CI) | DID estimate-%<br>diff (95% CI) | DID<br>estimate-<br>P value |
|------------------------------------------------|--------------|--------------|--------------|--------------|----------------------------|---------------------------------|---------------------------------|-----------------------------|
|                                                | Control      | Intervention | Control      | Intervention |                            |                                 |                                 |                             |
| <b>Immunization Status</b>                     |              |              |              |              |                            |                                 |                                 |                             |
|                                                | <b>N=321</b> | <b>N=345</b> | <b>N=293</b> | <b>N=363</b> |                            |                                 |                                 |                             |
| Fully Immunized                                | 22 (6.4)     | 25 (5.9)     | 51 (18.4)    | 110 (31.0)   | 11.9 (5.5, 18.3)           | 25.0 (16.7, 33.4)               | 13.1 (2.9, 23.3)                | 0.0127                      |
| Partially Immunized                            | 73 (21.9)    | 67 (19.7)    | 130 (43.1)   | 208 (56.5)   | 21.3 (12.3, 30.2)          | 36.9 (27.6, 46.2)               | 15.6 (3.0, 28.2)                | 0.0157                      |
| Non-recipients of Routine Immunization (NR-RI) | 226 (71.7)   | 253 (74.4)   | 112 (38.5)   | 45 (12.5)    | -33.2 (-43.2, -23.2)       | -61.9 (-70.3, -53.6)            | -28.7 (-41.4, -16.1)            | <0.0001                     |
| Zero Dose                                      | 226 (71.7)   | 251 (73.9)   | 27 (10.8)    | 11 (2.8)     | -60.9 (-68.3, -53.5)       | -71.1 (-79.8, -62.4)            | -10.2 (-21.3, 0.9)              | 0.0714                      |
| Ever had Vaccination Card                      | 67 (19.3)    | 63 (16.7)    | 180 (61.6)   | 301 (82.5)   | 42.2 (32.8, 51.7)          | 65.7 (57.7, 73.8)               | 23.5 (11.5, 35.5)               | 0.0002                      |
| <b>At Birth</b>                                |              |              |              |              |                            |                                 |                                 |                             |
|                                                | <b>N=321</b> | <b>N=345</b> | <b>N=293</b> | <b>N=363</b> |                            |                                 |                                 |                             |
| BCG                                            | 90 (26.9)    | 90 (25.1)    | 176 (59.9)   | 313 (86.2)   | 33.0 (23.0, 43.1)          | 61.1 (52.5, 69.7)               | 28.1 (15.2, 40.9)               | <0.0001                     |
| OPV0                                           | 90 (26.9)    | 84 (22.7)    | 161 (54.9)   | 288 (79.6)   | 28.0 (19.6, 36.5)          | 56.9 (47.0, 66.8)               | 28.9 (16.2, 41.5)               | <0.0001                     |
| <b>At 6 Weeks</b>                              |              |              |              |              |                            |                                 |                                 |                             |
|                                                | <b>N=309</b> | <b>N=327</b> | <b>N=285</b> | <b>N=353</b> |                            |                                 |                                 |                             |
| OPV1                                           | 72 (22.4)    | 60 (15.8)    | 160 (55.9)   | 279 (79.2)   | 33.5 (24.0, 43.0)          | 63.4 (54.4, 72.5)               | 29.9 (17.2, 42.7)               | <0.0001                     |
| Penta 1                                        | 87 (26.9)    | 74 (20.5)    | 176 (61.4)   | 306 (86.6)   | 34.5 (24.6, 44.4)          | 66.1 (57.0, 75.2)               | 31.6 (18.5, 44.7)               | <0.0001                     |
| PCV 1                                          | 82 (25.2)    | 73 (20.0)    | 176 (61.4)   | 305 (86.4)   | 36.3 (26.3, 46.2)          | 66.4 (57.3, 75.4)               | 30.1 (17.0, 43.2)               | <0.0001                     |
| Rota Virus 1                                   | 75 (22.8)    | 72 (19.9)    | 176 (61.4)   | 306 (86.6)   | 38.6 (28.9, 48.3)          | 66.7 (57.7, 75.8)               | 28.1 (15.2, 41.0)               | <0.0001                     |
| <b>At 10 Weeks</b>                             |              |              |              |              |                            |                                 |                                 |                             |
|                                                | <b>N=298</b> | <b>N=316</b> | <b>N=273</b> | <b>N=341</b> |                            |                                 |                                 |                             |
| OPV 2                                          | 33 (10.9)    | 34 (8.5)     | 81 (29.9)    | 184 (53.5)   | 19.1 (10.1, 28.0)          | 45.0 (36.3, 53.7)               | 25.9 (13.8, 38.0)               | 0.0001                      |
| Penta 2                                        | 61 (20.2)    | 54 (14.6)    | 149 (54.8)   | 235 (68.4)   | 34.6 (26.2, 42.9)          | 53.7 (45.5, 61.9)               | 19.2 (7.8, 30.5)                | 0.0013                      |
| PCV 2                                          | 58 (18.8)    | 51 (13.7)    | 147 (54.1)   | 234 (68.2)   | 35.3 (27.7, 42.9)          | 54.5 (46.6, 62.4)               | 19.2 (8.5, 29.9)                | 0.0006                      |
| Rota Virus 2                                   | 57 (18.5)    | 51 (13.9)    | 148 (54.4)   | 234 (67.9)   | 35.9 (27.5, 44.3)          | 54.0 (45.8, 62.2)               | 18.1 (6.7, 29.5)                | 0.0023                      |
| <b>At 14 Weeks</b>                             |              |              |              |              |                            |                                 |                                 |                             |
|                                                | <b>N=288</b> | <b>N=303</b> | <b>N=266</b> | <b>N=330</b> |                            |                                 |                                 |                             |
| OPV 3                                          | 24 (7.8)     | 29 (7.8)     | 68 (26.2)    | 153 (47.3)   | 18.5 (11.6, 25.4)          | 39.5 (29.7, 49.4)               | 21.1 (9.4, 32.7)                | 0.0006                      |
| Penta 3                                        | 24 (8.3)     | 29 (7.9)     | 53 (21.0)    | 125 (38.4)   | 12.7 (6.5, 18.9)           | 30.5 (21.6, 39.5)               | 17.8 (7.2, 28.4)                | 0.0013                      |
| PCV 3                                          | 24 (8.0)     | 29 (7.9)     | 53 (21.0)    | 124 (38.2)   | 12.9 (6.6, 19.3)           | 30.3 (21.4, 39.3)               | 17.4 (6.8, 28.0)                | 0.0018                      |
| IPV 1                                          | 61 (19.5)    | 59 (17.1)    | 148 (56.5)   | 228 (68.9)   | 37.1 (29.1, 45.1)          | 51.8 (41.8, 61.9)               | 14.7 (2.3, 27.2)                | 0.0212                      |
| <b>At 9 Months</b>                             |              |              |              |              |                            |                                 |                                 |                             |
|                                                | <b>N=249</b> | <b>N=256</b> | <b>N=237</b> | <b>N=275</b> |                            |                                 |                                 |                             |
| Measles 1                                      | 56 (20.6)    | 56 (19.8)    | 154 (66.4)   | 228 (83.9)   | 45.8 (35.6, 56.0)          | 64.2 (53.9, 74.4)               | 18.4 (4.3, 32.5)                | 0.0111                      |
| <b>At 15 Months</b>                            |              |              |              |              |                            |                                 |                                 |                             |
|                                                | <b>N=186</b> | <b>N=191</b> | <b>N=181</b> | <b>N=189</b> |                            |                                 |                                 |                             |
| Measles 2                                      | 24 (11.6)    | 28 (12.9)    | 62 (35.0)    | 87 (45.5)    | 23.4 (13.8, 33.0)          | 32.6 (18.1, 47.2)               | 9.2 (-7.8, 26.2)                | 0.2821                      |

**Table S3: Quetta - UC-Level Immunization Coverage at Baseline and Endline for Children Under-Three in Intervention and Control Areas**

|                                                | Baseline     |              | Endline      |              | Control-% diff<br>(95% CI) | Intervention-%<br>diff (95% CI) | DID estimate-%<br>diff (95% CI) | DID<br>estimate-<br>P value |
|------------------------------------------------|--------------|--------------|--------------|--------------|----------------------------|---------------------------------|---------------------------------|-----------------------------|
|                                                | Control      | Intervention | Control      | Intervention |                            |                                 |                                 |                             |
| <b>Immunization Status</b>                     |              |              |              |              |                            |                                 |                                 |                             |
|                                                | <b>N=468</b> | <b>N=465</b> | <b>N=304</b> | <b>N=337</b> |                            |                                 |                                 |                             |
| Fully Immunized                                | 52 (10.4)    | 122 (28.2)   | 10 (3.8)     | 160 (49.0)   | -6.6 (-10.9, -2.3)         | 20.8 (10.9, 30.8)               | 27.4 (16.8, 38.0)               | <0.0001                     |
| Partially Immunized                            | 199 (42.0)   | 176 (37.8)   | 126 (42.4)   | 176 (50.8)   | 0.4 (-12.0, 12.9)          | 13.0 (2.7, 23.3)                | 12.6 (-3.3, 28.4)               | 0.1183                      |
| Non-recipients of Routine Immunization (NR-RI) | 217 (47.6)   | 167 (34.1)   | 168 (53.8)   | 1 (0.2)      | 6.2 (-8.5, 20.9)           | -33.8 (-41.8, -25.8)            | -40.0 (-56.4, -23.6)            | <0.0001                     |
| Zero Dose                                      | 212 (46.6)   | 165 (33.6)   | 15 (5.4)     | 1 (0.2)      | -41.1 (-51.1, -31.2)       | -33.4 (-41.4, -25.3)            | 7.8 (-4.8, 20.3)                | 0.2235                      |
| Ever had Vaccination Card                      | 191 (39.5)   | 272 (60.7)   | 85 (29.0)    | 331 (98.3)   | -10.5 (-23.0, 1.9)         | 37.6 (29.1, 46.0)               | 48.1 (33.3, 62.9)               | <0.0001                     |
| <b>At Birth</b>                                |              |              |              |              |                            |                                 |                                 |                             |
|                                                | <b>N=468</b> | <b>N=465</b> | <b>N=304</b> | <b>N=337</b> |                            |                                 |                                 |                             |
| BCG                                            | 252 (52.5)   | 300 (66.4)   | 133 (45.1)   | 309 (92.5)   | -7.4 (-22.4, 7.6)          | 26.1 (17.7, 34.5)               | 33.5 (16.7, 50.4)               | 0.0002                      |
| OPV0                                           | 222 (46.6)   | 285 (63.0)   | 70 (24.2)    | 302 (90.5)   | -22.4 (-34.9, -9.9)        | 27.5 (19.7, 35.3)               | 49.9 (35.5, 64.3)               | <0.0001                     |
| <b>At 6 Weeks</b>                              |              |              |              |              |                            |                                 |                                 |                             |
|                                                | <b>N=457</b> | <b>N=459</b> | <b>N=304</b> | <b>N=330</b> |                            |                                 |                                 |                             |
| OPV 1                                          | 80 (17.3)    | 193 (42.9)   | 66 (23.1)    | 249 (77.1)   | 5.8 (-5.9, 17.5)           | 34.2 (23.8, 44.6)               | 28.4 (13.0, 43.7)               | 0.0004                      |
| Penta 1                                        | 171 (37.5)   | 214 (48.5)   | 67 (23.4)    | 274 (84.4)   | -14.1 (-26.0, -2.2)        | 35.9 (24.4, 47.4)               | 50.0 (33.8, 66.2)               | <0.0001                     |
| PCV 1                                          | 160 (35.1)   | 208 (47.3)   | 67 (23.4)    | 273 (83.9)   | -11.7 (-23.4, 0.0)         | 36.7 (25.1, 48.2)               | 48.3 (32.2, 64.5)               | <0.0001                     |
| Rota Virus 1                                   | 153 (33.2)   | 205 (46.7)   | 67 (23.4)    | 259 (80.1)   | -9.8 (-21.4, 1.7)          | 33.4 (21.4, 45.4)               | 43.2 (26.9, 59.6)               | <0.0001                     |
| <b>At 10 Weeks</b>                             |              |              |              |              |                            |                                 |                                 |                             |
|                                                | <b>N=446</b> | <b>N=452</b> | <b>N=299</b> | <b>N=322</b> |                            |                                 |                                 |                             |
| OPV 2                                          | 67 (14.5)    | 184 (42.2)   | 25 (9.4)     | 209 (66.3)   | -5.2 (-12.0, 1.6)          | 24.1 (13.9, 34.3)               | 29.3 (17.2, 41.3)               | <0.0001                     |
| Penta 2                                        | 68 (14.8)    | 179 (41.9)   | 61 (21.9)    | 221 (70.2)   | 7.1 (-4.4, 18.6)           | 28.3 (16.4, 40.2)               | 21.2 (5.0, 37.4)                | 0.0109                      |
| PCV 2                                          | 68 (14.8)    | 178 (41.7)   | 61 (21.9)    | 219 (69.3)   | 7.1 (-4.4, 18.6)           | 27.6 (15.8, 39.4)               | 20.6 (4.4, 36.7)                | 0.0133                      |
| Rota Virus 2                                   | 68 (14.8)    | 174 (40.8)   | 61 (21.9)    | 215 (68.0)   | 7.1 (-4.4, 18.6)           | 27.2 (15.4, 39.1)               | 20.1 (3.9, 36.4)                | 0.0155                      |
| <b>At 14 Weeks</b>                             |              |              |              |              |                            |                                 |                                 |                             |
|                                                | <b>N=435</b> | <b>N=440</b> | <b>N=293</b> | <b>N=307</b> |                            |                                 |                                 |                             |
| OPV 3                                          | 60 (13.2)    | 145 (35.2)   | 12 (4.6)     | 175 (58.7)   | -8.6 (-14.0, -3.2)         | 23.4 (12.7, 34.2)               | 32.0 (20.2, 43.8)               | <0.0001                     |
| Penta 3                                        | 59 (13.0)    | 145 (35.2)   | 12 (4.6)     | 173 (57.7)   | -8.4 (-13.8, -3.1)         | 22.5 (10.9, 34.1)               | 31.0 (18.5, 43.4)               | <0.0001                     |
| PCV 3                                          | 59 (13.0)    | 137 (33.2)   | 12 (4.6)     | 172 (57.5)   | -8.4 (-13.8, -3.1)         | 24.3 (13.2, 35.3)               | 32.7 (20.7, 44.7)               | <0.0001                     |
| IPV 1                                          | 106 (23.5)   | 164 (39.5)   | 60 (21.5)    | 212 (70.8)   | -2.0 (-13.0, 9.0)          | 31.3 (20.5, 42.1)               | 33.3 (18.2, 48.4)               | <0.0001                     |
| <b>At 9 Months</b>                             |              |              |              |              |                            |                                 |                                 |                             |
|                                                | <b>N=356</b> | <b>N=363</b> | <b>N=267</b> | <b>N=259</b> |                            |                                 |                                 |                             |
| Measles 1                                      | 76 (20.7)    | 150 (44.1)   | 61 (24.0)    | 180 (70.9)   | 3.3 (-7.6, 14.3)           | 26.8 (17.3, 36.3)               | 23.5 (9.3, 37.7)                | 0.0015                      |
| <b>At 15 Months</b>                            |              |              |              |              |                            |                                 |                                 |                             |
|                                                | <b>N=251</b> | <b>N=267</b> | <b>N=222</b> | <b>N=199</b> |                            |                                 |                                 |                             |
| Measles 2                                      | 27 (10.4)    | 77 (30.5)    | 46 (21.6)    | 97 (48.9)    | 11.3 (-0.2, 22.8)          | 18.5 (6.8, 30.1)                | 7.2 (-8.9, 23.3)                | 0.3769                      |

**Table S4: Sociodemographic Factors Associated with Zero-Dose Children based o Logistic Regression for UCs in All Three Districts**

|                             | Zero Doser   |             | Bivariate |                 |         | Multivariate |                 |         |
|-----------------------------|--------------|-------------|-----------|-----------------|---------|--------------|-----------------|---------|
|                             | No           | Yes         | OR        | CI              | P-value | OR           | CI              | P-value |
|                             | N=3314       | N=929       |           |                 |         |              |                 |         |
| <b>Gender</b>               |              |             |           |                 |         |              |                 |         |
| Male                        | 1697 (50.6%) | 469 (49.3%) | Ref       |                 |         |              |                 |         |
| Female                      | 1617 (49.4%) | 460 (50.7%) | 1.053     | (0.892, 1.242)  | 0.542   |              |                 |         |
| <b>Arm</b>                  |              |             |           |                 |         |              |                 |         |
| Control                     | 1589 (51.9%) | 494 (66.7%) | 1.853     | (1.265, 2.714)  | 0.002   | 2.289        | (1.625, 3.225)  | <0.001  |
| Intervention                | 1725 (48.1%) | 435 (33.3%) | Ref       |                 |         |              |                 |         |
| <b>Maternal Education</b>   |              |             |           |                 |         |              |                 |         |
| No formal Schooling         | 2534 (74.7%) | 848 (89.0%) | 7.531     | (4.562, 12.433) | <0.001  | 3.315        | (1.959, 5.612)  | <0.001  |
| Primary                     | 288 (11.3%)  | 56 (8.8%)   | 4.903     | (2.372, 10.136) | <0.001  | 2.780        | (1.407, 5.496)  | 0.003   |
| Secondary or above          | 492 (14.0%)  | 25 (2.2%)   | Ref       |                 |         |              |                 |         |
| <b>Socioeconomic status</b> |              |             |           |                 |         |              |                 |         |
| Poorest                     | 469 (8.1%)   | 305 (21.0%) | 11.927    | (6.200, 22.944) | <0.001  | 11.452       | (5.802, 22.608) | <0.001  |
| Poor                        | 557 (15.1%)  | 282 (26.7%) | 8.120     | (4.272, 15.432) | <0.001  | 7.490        | (3.911, 14.342) | <0.001  |
| Middle                      | 690 (27.2%)  | 210 (32.4%) | 5.469     | (2.818, 10.612) | <0.001  | 4.800        | (2.486, 9.267)  | <0.001  |
| Rich                        | 839 (28.9%)  | 99 (15.4%)  | 2.456     | (1.292, 4.669)  | 0.006   | 2.339        | (1.233, 4.438)  | 0.010   |
| Richest                     | 759 (20.7%)  | 33 (4.5%)   | Ref       |                 |         |              |                 |         |

**Table S5: Sociodemographic Factors Associated with Non-Recipients of Routine Immunization (NR-RI) Children based on Logistic Regression for UCs in All Three Districts**

|                             | NR-RI        |              | Bivariate |                 |         | Multivariate |                 |         |
|-----------------------------|--------------|--------------|-----------|-----------------|---------|--------------|-----------------|---------|
|                             | No           | Yes          | OR        | C.I             | P-value | OR           | C.I             | P-value |
|                             | N=3034       | N=1209       |           |                 |         |              |                 |         |
| <b>Gender</b>               |              |              |           |                 |         |              |                 |         |
| Male                        | 1556 (50.9%) | 610 (48.9%)  | Ref       |                 |         |              |                 |         |
| Female                      | 1478 (49.1%) | 599 (51.1%)  | 1.083     | (0.944, 1.242)  | 0.255   |              |                 |         |
| <b>Arm</b>                  |              |              |           |                 |         |              |                 |         |
| Control                     | 1348 (48.0%) | 735 (72.6%)  | 2.881     | (2.010, 4.131)  | <0.001  | 3.880        | (2.857, 5.269)  | <0.001  |
| Intervention                | 1686 (52.0%) | 474 (27.4%)  | Ref       |                 |         |              |                 |         |
| <b>Maternal Education</b>   |              |              |           |                 |         |              |                 |         |
| No formal Schooling         | 2268 (72.9%) | 1114 (90.0%) | 6.795     | (4.205, 10.981) | <0.001  | 2.866        | (1.794, 4.578)  | <0.001  |
| Primary                     | 283 (12.1%)  | 61 (7.3%)    | 3.304     | (1.660, 6.575)  | 0.001   | 1.777        | (0.963, 3.279)  | 0.066   |
| Secondary or above          | 483 (15.0%)  | 34 (2.7%)    | Ref       |                 |         |              |                 |         |
| <b>Socioeconomic status</b> |              |              |           |                 |         |              |                 |         |
| Poorest                     | 397 (7.6%)   | 377 (19.0%)  | 11.348    | (6.534, 19.709) | <0.001  | 13.657       | (7.495, 24.886) | <0.001  |
| Poor                        | 494 (14.9%)  | 345 (24.5%)  | 7.486     | (4.338, 12.917) | <0.001  | 8.296        | (4.701, 14.643) | <0.001  |
| Middle                      | 579 (24.7%)  | 321 (37.2%)  | 6.825     | (3.923, 11.874) | <0.001  | 6.991        | (3.987, 12.260) | <0.001  |
| Rich                        | 817 (30.6%)  | 121 (14.4%)  | 2.136     | (1.287, 3.547)  | 0.003   | 2.172        | (1.289, 3.660)  | 0.004   |
| Richest                     | 747 (22.1%)  | 45 (4.9%)    | Ref       |                 |         |              |                 |         |

**Table S6: Sociodemographic Factors Associated with Zero-Dose Children based on Logistic Regression for UCs in Districts Quetta and Lakki Marwat**

|                             | Zerodoser    |             | Bivariate |               |         | Multivariate |               |         |
|-----------------------------|--------------|-------------|-----------|---------------|---------|--------------|---------------|---------|
|                             | No           | Yes         | OR        | CI            | P-value | OR           | CI            | P-value |
|                             | N=1988       | N=908       |           |               |         |              |               |         |
| <b>Gender</b>               |              |             |           |               |         |              |               |         |
| Male                        | 1042 (51.6%) | 461 (49.6%) | Ref       |               |         |              |               |         |
| Female                      | 946 (48.4%)  | 447 (50.4%) | 1.08      | (0.907,1.287) | 0.384   | -            | -             | -       |
| <b>Arm</b>                  |              |             |           |               |         |              |               |         |
| Control                     | 906 (52.7%)  | 480 (66.6%) | 1.79      | (1.246,2.584) | 0.002   | 1.79         | (1.278,2.498) | 0.001   |
| Intervention                | 1082 (47.3%) | 428 (33.4%) | Ref       |               |         | Ref          |               |         |
| <b>Maternal Education</b>   |              |             |           |               |         |              |               |         |
| No formal Schooling         | 1669 (79.8%) | 832 (89.4%) | 3.04      | (1.585,5.824) | 0.001   | 2.04         | (1.041,4.003) | 0.038   |
| Primary                     | 243 (15.4%)  | 55 (8.8%)   | 1.55      | (0.681,3.538) | 0.293   | 1.64         | (0.742,3.630) | 0.219   |
| Secondary or above          | 76 (4.8%)    | 21 (1.8%)   | Ref       |               |         | Ref          |               |         |
| <b>Socioeconomic status</b> |              |             |           |               |         |              |               |         |
| Poorest                     | 330 (8.9%)   | 206 (14.9%) | 2.67      | (1.648,4.314) | <0.001  | 2.85         | (1.677,4.829) | <0.001  |
| Poor                        | 311 (8.7%)   | 218 (14.8%) | 2.69      | (1.706,4.238) | <0.001  | 2.66         | (1.686,4.200) | <0.001  |
| Middle                      | 397 (19.8%)  | 191 (22.4%) | 1.79      | (1.178,2.714) | 0.007   | 2.24         | (1.436,3.502) | <0.001  |
| Rich                        | 458 (28.5%)  | 163 (26.4%) | 1.46      | (0.935,2.292) | 0.096   | 1.58         | (0.986,2.525) | 0.057   |
| Richest                     | 492 (34.1%)  | 130 (21.5%) | Ref       |               |         | Ref          |               |         |

**Table S7: Sociodemographic Factors Associated with Non-Recipients of Routine Immunization (NR-RI) Children based on Logistic Regression for UCs in Districts Quetta and Lakki Marwat**

|                             | NR-RI        |              | Bivariate |               |         | Multivariate |               |         |
|-----------------------------|--------------|--------------|-----------|---------------|---------|--------------|---------------|---------|
|                             | No           | Yes          | OR        | C.I           | P-value | OR           | C.I           | P-value |
|                             | N=1707       | N=1189       |           |               |         |              |               |         |
| <b>Gender</b>               |              |              |           |               |         |              |               |         |
| Male                        | 899 (52.2%)  | 604 (49.2%)  | Ref       |               |         |              |               |         |
| Female                      | 808 (47.8%)  | 585 (50.8%)  | 1.13      | (0.967,1.317) | 0.123   | -            | -             | -       |
| <b>Arm</b>                  |              |              |           |               |         |              |               |         |
| Control                     | 663 (46.1%)  | 723 (73.0%)  | 3.16      | (2.228,4.474) | <0.001  | 3.36         | (2.485,4.554) | <0.001  |
| Intervention                | 1044 (53.9%) | 466 (27.0%)  | Ref       |               |         | Ref          |               |         |
| <b>Maternal Education</b>   |              |              |           |               |         |              |               |         |
| No formal Schooling         | 1404 (77.7%) | 1097 (90.1%) | 2.49      | (1.334,4.639) | 0.004   | -            | -             | -       |
| Primary                     | 235 (17.4%)  | 63 (7.6%)    | 0.93      | (0.432,2.009) | 0.855   | -            | -             | -       |
| Secondary or above          | 68 (4.9%)    | 29 (2.3%)    | Ref       |               |         |              |               |         |
| <b>Socioeconomic status</b> |              |              |           |               |         |              |               |         |
| Poorest                     | 280 (8.8%)   | 256 (13.5%)  | 2.43      | (1.557,3.787) | <0.001  | 3.77         | (2.305,6.151) | <0.001  |
| Poor                        | 259 (8.6%)   | 270 (13.4%)  | 2.47      | (1.612,3.784) | <0.001  | 3.06         | (2.006,4.658) | <0.001  |
| Middle                      | 360 (20.9%)  | 228 (20.1%)  | 1.53      | (1.069,2.196) | 0.02    | 2.43         | (1.690,3.484) | <0.001  |
| Rich                        | 365 (26.0%)  | 256 (30.7%)  | 1.88      | (1.290,2.732) | 0.001   | 2.43         | (1.684,3.507) | <0.001  |
| Richest                     | 443 (35.6%)  | 179 (22.4%)  | Ref       |               |         | Ref          |               |         |
